# Supplementary material for: Presence and Characterization of a Novel cfr-Carrying Tn558 Transposon Derivative in Staphylococcus delphini Isolated From Retail Food
Source: PubMed Central journal article supplement (PMC7843796; doi:10.3389/fmicb.2020.598990), 2021-01-15
Supplement: Image_1.pdf [file Image_1.pdf]

*Supplementary Material*

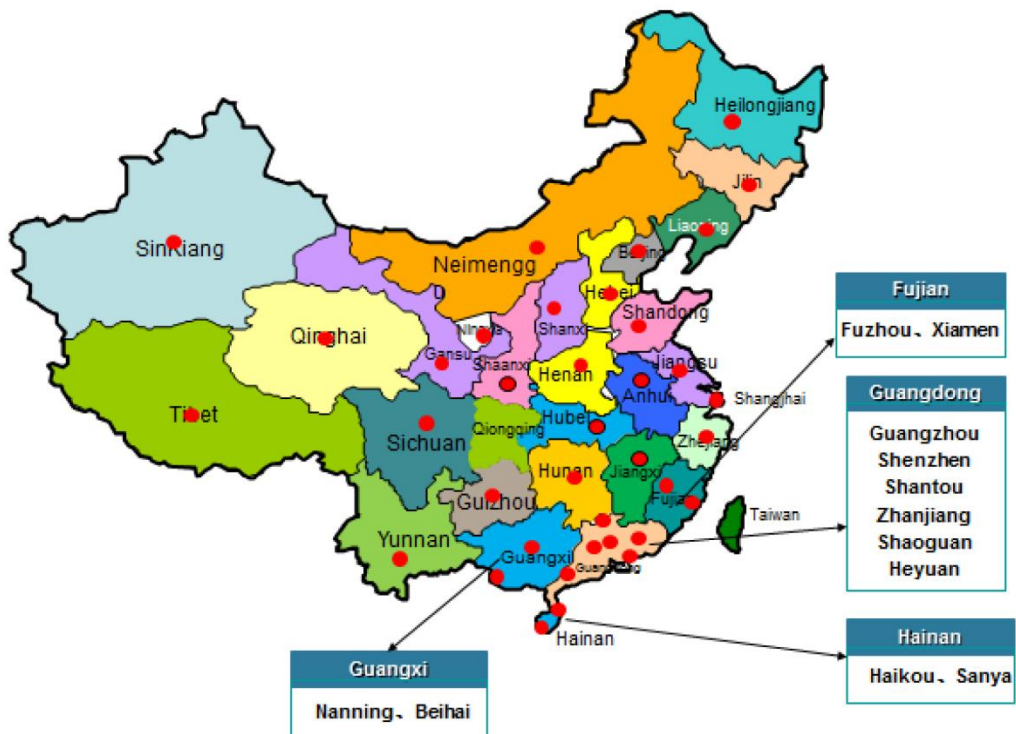

**Supplementary Figure 1.** Sample collection locations for this study in China.
